# Supplementary material for: The Effects of PP2A Disruption on ER-Mitochondria Contact and Mitochondrial Functions in Neuronal-like Cells
Source: MDPI journal article supplement (doi:10.3390/biomedicines11041011), 2023-03-26
Supplement: s1 [file s1]

## The effects of PP2A disruption on ER-mitochondria contact and mitochondrial functions in neuronal cells

Phaewa Chaiwijit , Kwanchanok Uppakara, Nithi Asavapanumas and Witchuda Saengsawang

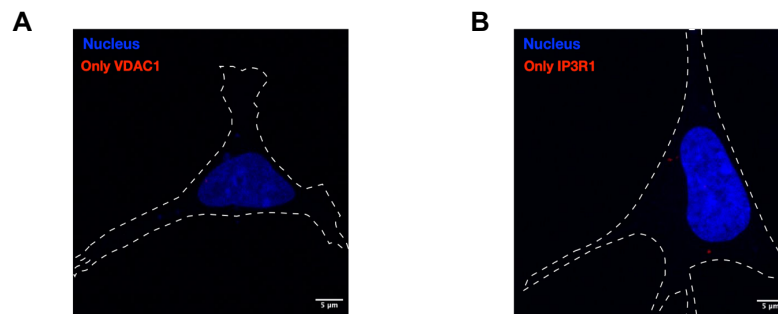

**Figure S1** PLA negative controls. The PLA was performed in SHSY5Y cells as described in materials and methods without IP3R1 antibody (A) or without VDAC1 antibody (B). Scale bars are 5 µm

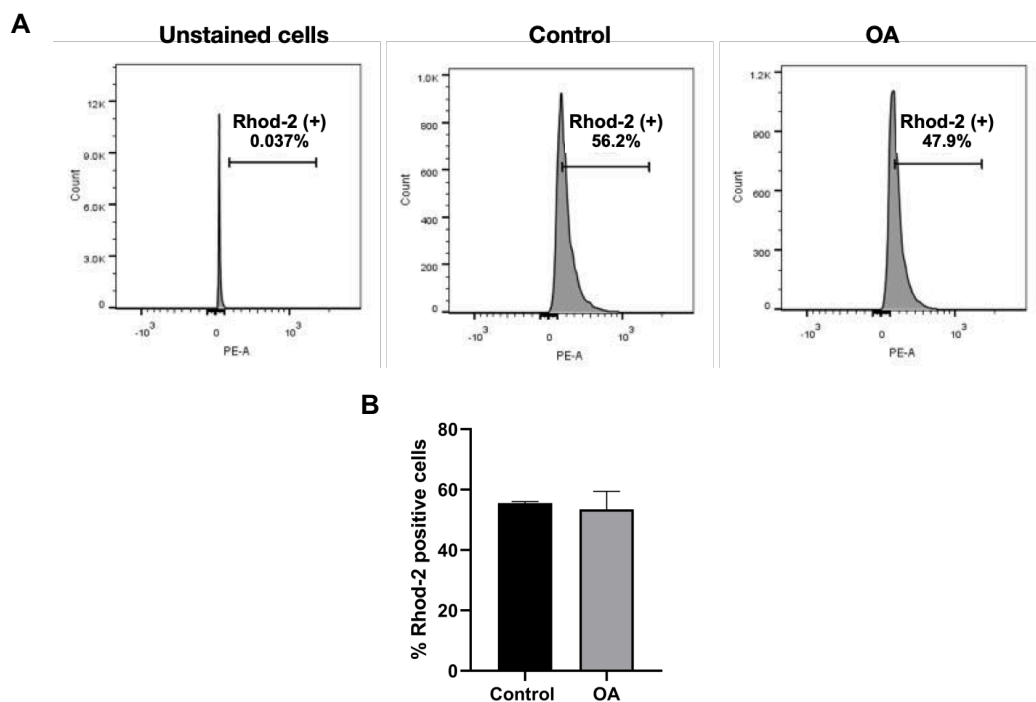

**Figure S2** Basal level of mitochondrial  $\text{Ca}^{2+}$  is not altered after okadaic acid exposure. (A) Representative figures of percentages of rhod-2 positive cells. Unstained cells are used as negative control and quantification of gated cell are shown in bar chart of rhod-2 positive cells (B). Data represent mean  $\pm$  S.E.M. of three independent experiments.

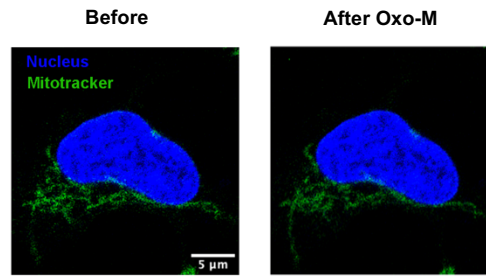

**Figure S3** Representative time-lapse images of control cells loaded with Mitotracker fluorescence dye. The images were captured at 880 ms intervals and are shown as before and 2 min after Oxo-M stimulation.
